# Supplementary material
Source: Springer Nature journal article supplement (https://www.springerprofessional.de/resource/supplementary/13677_2012_29_MOESM5_ESM.pdf/10743508)

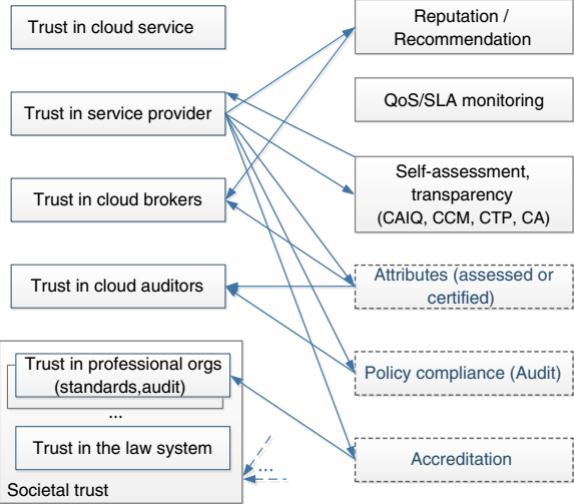

Supplement: MOESM5 [file 10743508]
